# Supplementary material for: Insulin-induced changes in skeletal muscle microvascular perfusion are dependent upon perivascular adipose tissue in women
Source: Springer Nature journal article supplement (doi:10.1007/s00125-015-3606-8), 2015-05-23
Supplement: MOESM2 [file 8093012]

### ESM Table 1

Addendum to Fig. 2b

|                                                         | Estimate of standardised beta | 95% confidence interval |
|---------------------------------------------------------|-------------------------------|-------------------------|
| c-path<br>(BMI-group – M-value)                         | -0.39                         | [-0.74; -0.05]          |
| c'-path<br>(BMI-group – M-value adjusted for mediation) | -0.21                         | [-0.56; 0.13]           |

The betas with confidence intervals of the relation between BMI-group and M-value, unadjusted (c-path) and adjusted (c'-path) for the mediation by microvascular recruitment
