# Supplementary material for: Insulin-induced changes in skeletal muscle microvascular perfusion are dependent upon perivascular adipose tissue in women
Source: Springer Nature journal article supplement (doi:10.1007/s00125-015-3606-8), 2015-05-23
Supplement: MOESM3 [file 8093012]

## ESM Table 2

Addendum to Fig. 3c

|                                                                           | Estimate of standardised beta | 95% confidence interval |
|---------------------------------------------------------------------------|-------------------------------|-------------------------|
| c-path<br>(BMI-group – Microvascular recruitment)                         | -0.40                         | [-0.64; -0.16]          |
| c'-path<br>(BMI-group – Microvascular recruitment adjusted for mediation) | 0.01                          | [-0.39; 0.40]           |

The betas with confidence intervals of the relation between BMI-group and microvascular recruitment, unadjusted (c-path) and adjusted (c'-path) for the mediation by perivascular adipocyte size
